# Supplementary material for: The Overlap of Small Molecule and Protein Binding Sites within Families of Protein Structures
Source: PubMed Central journal article supplement (PMC2816688; doi:10.1371/journal.pcbi.1000668), 2010-02-05
Supplement: pcbi.1000668.s001.pdf [file pcbi.1000668.s001.pdf]

Table S1: **Summary of protein and small molecule binding sites in families of protein structures.**

| <i>Number of families</i>  | Total | bind small molecules | $\geq 5$ bi-functional positions |
|----------------------------|-------|----------------------|----------------------------------|
| Total                      | 3,463 | 1,131                |                                  |
| Domain-peptide             | 469   | 232                  | 150                              |
| Domain-domain, inter-chain | 2,120 | 900                  | 570                              |
| Domain-domain, intra-chain | 1,189 | 562                  | 356                              |
| Total protein-binding      | 2,619 | 1,028                | 736                              |

The number of protein families with at least 5 bi-functional positions are shown for each kind of protein interface. Bi-functional positions refer to alignment positions that bind both small molecules (250-1000 Da) and proteins.
