# Supplementary material for: The Overlap of Small Molecule and Protein Binding Sites within Families of Protein Structures
Source: PubMed Central journal article supplement (PMC2816688; doi:10.1371/journal.pcbi.1000668), 2010-02-05
Supplement: pcbi.1000668.s003.pdf [file pcbi.1000668.s003.pdf]

Table S3: **Summary of protein interactions and their overlap with aligned ligand binding sites from homologous structures.**

| <i>Number of interactions</i> | total  | ligand overlap $\geq$ 20% |         |
|-------------------------------|--------|---------------------------|---------|
|                               |        | cumulative                | maximal |
| Domain – peptide              | 2,332  | 1,215                     | 1,070   |
| Domain – domain (inter-chain) | 12,015 | 5,617                     | 4,170   |
| Domain – domain (intra-chain) | 4,290  | 2,053                     | 1,498   |
| Total                         | 18,637 | 8,885                     | 6,738   |

The numbers of protein interfaces with at least 20% cumulative or maximal overlap with homologous ligand binding sites are shown for each kind of protein interface. The overlap score refers to the fraction of interface residues aligned to ligand binding site residues (Text Eqn 2).
