# Supplementary material for: The Overlap of Small Molecule and Protein Binding Sites within Families of Protein Structures
Source: PubMed Central journal article supplement (PMC2816688; doi:10.1371/journal.pcbi.1000668), 2010-02-05
Supplement: pcbi.1000668.s004.pdf [file pcbi.1000668.s004.pdf]

Table S4: **The function propensities of families with significantly ( $p < 0.01$ ) higher or lower number of bi-functional positions than expected by chance.**

| Function                | Propensity of families with significantly low bi-functional positions (95% confidence interval) | Propensity of families with significantly high bi-functional positions (95% confidence interval) |
|-------------------------|-------------------------------------------------------------------------------------------------|--------------------------------------------------------------------------------------------------|
| Information             | 1.197 (0.535, 2.123)                                                                            | 1.099 (0.571, 1.768)                                                                             |
| Metabolism              | 1.237 * (1.074, 1.401)                                                                          | 0.848 * (0.719, 0.976)                                                                           |
| Extracellular processes | 0.325 (0, 1.051)                                                                                | 0.932 (0.193, 2.135)                                                                             |
| Intracellular processes | 0.718 (0.296, 1.252)                                                                            | 1.648 * (1.169, 2.298)                                                                           |
| Regulation              | 0.39 * (0, 0.858)                                                                               | 1.118 (0.607, 1.765)                                                                             |
| General                 | 0.666 (0.204, 1.264)                                                                            | 1.464 (0.879, 2.205)                                                                             |
| Other                   | 0.337 * (0, 0.875)                                                                              | 0.387 * (0.084, 0.852)                                                                           |

Bootstrap resampling was performed to compute 95% confidence intervals of the function propensities (Text Eqn 5). Propensities are considered significant (asterisk) at the  $\alpha = 0.05$  level if their confidence intervals do not include the value 1.
