# Supplementary material for: The Overlap of Small Molecule and Protein Binding Sites within Families of Protein Structures
Source: PubMed Central journal article supplement (PMC2816688; doi:10.1371/journal.pcbi.1000668), 2010-02-05
Supplement: pcbi.1000668.s005.pdf [file pcbi.1000668.s005.pdf]

Table S5: **The residue type propensity at alignment positions that bind both ligands and proteins, bind ligands, or bind proteins in comparison to all solvent-exposed residues.**

| amino acid | Propensity at Ligand-only positions (95% confidence interval) | Propensity at Protein-only positions (95% confidence interval) | Propensity at Bi-functional positions (95% confidence interval) |
|------------|---------------------------------------------------------------|----------------------------------------------------------------|-----------------------------------------------------------------|
| A          | 1.027 (0.993, 1.06)                                           | 0.978 * (0.967, 0.989)                                         | 0.943 * (0.919, 0.964)                                          |
| C          | 1.425 * (1.334, 1.529)                                        | 1.085 * (1.06, 1.119)                                          | 1.002 (0.942, 1.053)                                            |
| D          | 0.837 * (0.802, 0.869)                                        | 0.996 (0.984, 1.008)                                           | 0.932 * (0.909, 0.956)                                          |
| E          | 0.685 * (0.658, 0.712)                                        | 1.016 * (1.004, 1.029)                                         | 0.831 * (0.811, 0.852)                                          |
| F          | 1.367 * (1.312, 1.424)                                        | 0.972 * (0.953, 0.987)                                         | 1.178 * (1.139, 1.211)                                          |
| G          | 1.277 * (1.236, 1.316)                                        | 0.931 * (0.92, 0.941)                                          | 1.095 * (1.072, 1.117)                                          |
| H          | 1.332 * (1.267, 1.394)                                        | 0.976 * (0.954, 0.997)                                         | 1.179 * (1.139, 1.225)                                          |
| I          | 1.172 * (1.131, 1.217)                                        | 1.003 (0.99, 1.018)                                            | 0.955 * (0.928, 0.98)                                           |
| K          | 0.65 * (0.622, 0.677)                                         | 1.002 (0.99, 1.014)                                            | 0.904 * (0.882, 0.927)                                          |
| L          | 1.103 * (1.074, 1.136)                                        | 0.996 (0.985, 1.007)                                           | 0.967 * (0.946, 0.988)                                          |
| M          | 1.363 * (1.283, 1.442)                                        | 1.012 (0.987, 1.036)                                           | 1.114 * (1.071, 1.16)                                           |
| N          | 0.912 * (0.872, 0.952)                                        | 1.009 (0.993, 1.024)                                           | 1.009 (0.983, 1.041)                                            |
| P          | 0.748 * (0.711, 0.783)                                        | 1.035 * (1.019, 1.049)                                         | 0.893 * (0.867, 0.92)                                           |
| Q          | 0.712 * (0.67, 0.748)                                         | 1.024 * (1.009, 1.041)                                         | 0.954 * (0.922, 0.981)                                          |
| R          | 0.849 * (0.815, 0.884)                                        | 1.04 * (1.027, 1.055)                                          | 1.019 (0.992, 1.044)                                            |
| S          | 0.925 * (0.892, 0.962)                                        | 1.02 * (1.007, 1.032)                                          | 1.059 * (1.032, 1.084)                                          |
| T          | 0.971 (0.934, 1.006)                                          | 1.007 (0.993, 1.021)                                           | 1.024 (0.998, 1.051)                                            |
| V          | 1.152 * (1.113, 1.187)                                        | 1.008 (0.997, 1.022)                                           | 0.978 (0.954, 1.003)                                            |
| W          | 1.442 * (1.348, 1.529)                                        | 0.946 * (0.92, 0.972)                                          | 1.33 * (1.267, 1.383)                                           |
| Y          | 1.171 * (1.122, 1.221)                                        | 0.991 (0.975, 1.01)                                            | 1.242 * (1.205, 1.28)                                           |

Bootstrap resampling was performed to compute 95% confidence intervals (CI) of the residue type propensities (Text Eqn 3). Propensities are considered significant (asterisk) at the  $\alpha = 0.05$  level if their confidence intervals do not include the value 1.
