# Supplementary material for: The Overlap of Small Molecule and Protein Binding Sites within Families of Protein Structures
Source: PubMed Central journal article supplement (PMC2816688; doi:10.1371/journal.pcbi.1000668), 2010-02-05
Supplement: pcbi.1000668.s006.pdf [file pcbi.1000668.s006.pdf]

Table S6: Examples of ligand binding sites that align to protein–protein interfaces with a high sequence similarity.

| Protein interaction                                 |                                                       | Ligand       | Overlap | Sequence identity |        |
|-----------------------------------------------------|-------------------------------------------------------|--------------|---------|-------------------|--------|
|                                                     |                                                       |              |         | bind site         | domain |
| <i>Enzyme–protein inhibitors</i>                    |                                                       |              |         |                   |        |
| 1iid:A,O                                            | (p) N-myristoyltransferase – GLYASKLA                 | 1iy1:R64     | 63%     | 100%              | 52%    |
| 2q4g:Y,Z                                            | (d) Ribonuclease I – human ribonuclease inhibitor     | 1u1b:PAX     | 42%     | 100%              | 64%    |
| 1bqq:M,T                                            | (d) MT1-MMP–TIMP-2                                    | 1rm8:BAT     | 37%     | 100%              | 67%    |
| 1ta3:A,B                                            | (d) Xylanase – inhibitor                              | 1e0v:FFC     | 33%     | 100%              | 44%    |
| 1zli:A,B                                            | (p) Carboxypeptidase B – tick inhibitor               | 1bav:BIP     | 21%     | 92%               | 45%    |
| 2f91:A,B                                            | (p) Crayfish trypsin – peptide inhibitor              | 1y3y:UIR     | 48%     | 95%               | 41%    |
| 1y1k:E,I                                            | (p) Subtilisin BPN – chymotrypsin inhibitor 2         | 1bh6:1BH     | 81%     | 93%               | 69%    |
| 2aq9:A,X                                            | (p) UDP-N-Acetylglucosamine acyltransferase – peptide | 1j2z:SOG     | 64%     | 86%               | 40%    |
| <i>Enzyme–protein substrates; Enzyme homodimers</i> |                                                       |              |         |                   |        |
| 1tg4:A,I                                            | (p) Russells Viper Phospholipase A2 – FLAYK           | 1rgb:ELD (*) | 69%     | 100%              | 54%    |
| 1t4f:M,P                                            | (p) MDM2 – p53 peptide                                | 1ttv:IMY     | 100%    | 96%               | 62%    |
| 1qgd:A,B                                            | (d) Transketolase dimer                               | 1itz:TPP     | 37%     | 100%              | 42%    |
| 1fpy:D,E                                            | (d) Glutamine synthetase dimer                        | 2bvc:P3S     | 21%     | 100%              | 53%    |
| 1akm:A,C                                            | (d) Ornithine transcarbamylase dimer                  | 2fzc:EOP     | 20%     | 100%              | 34%    |
| <i>Regulatory or structural interaction</i>         |                                                       |              |         |                   |        |
| 2prg:A,C                                            | (d) PPAR $\gamma$ – Src-1                             | 1y0s:B7G     | 53%     | 100%              | 62%    |
| 1ib1:C,G                                            | (d) 14-3-3 $\zeta$ – Serotonin N-Acetyltransferase    | 1o9e:FSC     | 40%     | 100%              | 63%    |
| 1a38:A,P                                            | (p) 14-3-3 $\zeta$ – R18 peptide                      | 1o9e:FSC     | 50%     | 100%              | 63%    |
| 1nwd:A,C                                            | (p) Calmodulin – Glutamate decarboxylase (c-term)     | 1lxf:BEP (*) | 52%     | 86%               | 34%    |
| 1k93:B,E                                            | (d) Calmodulin – Anthrax edema factor                 | 1lxf:BEP (*) | 2%      | 86%               | 32%    |

The overlap (Text Eqn 2) between each ligand and protein interface is shown along with the sequence identity of the ligand binding site and the full-length domain sequence. (d) refers to inter-molecular domain–domain interactions, (p) refers to domain–peptide interactions, and (\*) indicates ligands that were present at domain interfaces.
