# Supplementary material for: The Overlap of Small Molecule and Protein Binding Sites within Families of Protein Structures
Source: PubMed Central journal article supplement (PMC2816688; doi:10.1371/journal.pcbi.1000668), 2010-02-05
Supplement: pcbi.1000668.s007.pdf [file pcbi.1000668.s007.pdf]

Table S7: Examples of ligand binding sites that align to intra-molecular domain–domain interfaces

| Interaction                                    |                                  | Ligand   | Overlap | Sequence identity |        |
|------------------------------------------------|----------------------------------|----------|---------|-------------------|--------|
|                                                |                                  |          |         | bind site         | domain |
| <i>(A) Exact sequence matches</i>              |                                  |          |         |                   |        |
| 2c78:A                                         | Elongation factor Tu             | 1ha3:MAU | 93%     | 100%              | 100%   |
| 1su3:B                                         | ProMMP-1                         | 4ayk:CGS | 76%     | 100%              | 96%    |
| 4ake:A                                         | Adenylate kinase                 | 1ake:AP5 | 75%     | 100%              | 100%   |
| 1fmk:A                                         | Tyrosine kinase c-Src            | 1o42:843 | 50%     | 100%              | 95%    |
| 1t56:A                                         | TetR/CamR family repressor EthR  | 1u9n:CNS | 38%     | 100%              | 99%    |
| 1xmm:D                                         | DcpS                             | 1st4:GTA | 38%     | 95%               | 99%    |
| 1g6l:A                                         | HIV Protease                     | 1dif:A85 | 37%     | 100%              | 99%    |
| 1ft4:A                                         | Tumor necrosis factor            | 1ft4:703 | 36%     | 100%              | 100%   |
| 1b3r:C                                         | S-adenosylhomocysteine hydrolase | 1li4:NOC | 36%     | 94%               | 95%    |
| 2ofp:A                                         | Ketopantoate reductase           | 1yon:APX | 35%     | 100%              | 100%   |
| 1jt0:C                                         | QacR–DNA complex                 | 1jus:RHQ | 32%     | 100%              | 100%   |
| <i>(B) Highly similar ligand binding sites</i> |                                  |          |         |                   |        |
| 1v8b:C                                         | Adenosylhomocysteinase           | 1k0u:DEA | 26%     | 93%               | 48%    |
| 1bg5:A                                         | Alpha-Na K-ATPase – GST fusion   | 1c72:EPY | 22%     | 93%               | 57%    |
| 2bvn:B                                         | Elongation factor Tu             | 2c78:PUL | 59%     | 93%               | 67%    |
| 1ak2:A                                         | Adenylate kinase 2               | 1dvr:ATF | 33%     | 93%               | 48%    |
| 2b8e:B                                         | CopA ATP binding domain          | 1t5s:ACP | 20%     | 93%               | 35%    |
| 1exm:A                                         | Elongation Factor Tu             | 1ob2:KIR | 79%     | 92%               | 68%    |
| 1gxd:B                                         | 72 KDa Type IV collagenase       | 830c:RS1 | 63%     | 90%               | 63%    |
| 1ad5:B                                         | Haematopoietic cell kinase HCK   | 1fbz:CC1 | 56%     | 89%               | 68%    |
| 1miy:B                                         | CCA-adding enzyme                | 1vfg:APC | 26%     | 90%               | 30%    |

The overlap (Text Eqn 2) between each ligand and domain interface is shown along with the sequence identity of the ligand binding site and the full-length domain sequence.
